# Supplementary material for: A tool to predict the risk of lower extremity amputation in patients starting dialysis
Source: PubMed Central journal article supplement — Nephrol Dial Transplant. 2024 Feb 26;39(10):1672–82. doi: 10.1093/ndt/gfae050 (PMC11427081; doi:10.1093/ndt/gfae050), 2024-02-26
Supplement: gfae050_supplemental_file.pdf [file gfae050_supplemental_file.pdf]

# Development and external validation of a multivariable prognostic model to predict the 3 year risk of non-traumatic lower limb amputation in patients starting dialysis

## Supplemental materials

Bram Akerboom, Roemer J. Janse, Aurora Caldinelli, Bengt Lindholm, Joris I. Rotmans, Marie Evans, Merel van Diepen

## Table of Contents

|                                                                                                      |           |
|------------------------------------------------------------------------------------------------------|-----------|
| <b>Supplemental methods</b> .....                                                                    | <b>2</b>  |
| <b>Supplemental Tables</b> .....                                                                     | <b>3</b>  |
| <b>Supplemental Table 1</b> Definition of covariates and outcomes and time-windows of inclusion..... | <b>3</b>  |
| <b>Supplemental Table 2</b> Number of missing values and multiple imputation.....                    | <b>6</b>  |
| <b>Supplemental Table 3</b> Candidate predictors.....                                                | <b>7</b>  |
| <b>Supplemental Table 4</b> Correlation matrix .....                                                 | <b>8</b>  |
| <b>Supplemental Table 5</b> Final model baseline CIF and coefficients .....                          | <b>9</b>  |
| <b>Supplemental figures</b> .....                                                                    | <b>10</b> |
| <b>Supplemental figure 1</b> linearity of continuous coefficients .....                              | <b>10</b> |
| <b>Supplemental figure 2</b> Residuals plot for proportional hazards assumption .....                | <b>11</b> |
| <b>Supplemental figure 3</b> Distribution of predicted probabilities .....                           | <b>13</b> |
| <b>Supplemental figure 4</b> Sensitivity analyses: calibration plots.....                            | <b>14</b> |
| <b>TRIPOD checklist</b> .....                                                                        | <b>16</b> |

## Supplemental methods

For laboratory values, height, weight and blood pressure measurements the following selection process was used for inclusion:

1. If one or more covariates are measured before starting dialysis and within the predetermined maximum time before baseline (**Supplemental Table 1**) the measurement closest to start dialysis was included. If no measurements were available we proceeded to step 2.
2. If one or more covariates are measured after starting dialysis and within the predetermined maximum time after baseline (**Supplemental Table 1**) the measurement closest to start dialysis was included. If no measurements were available we proceeded to step 3.
3. The covariate was coded and treated as a missing value and handled through multiple imputation.

**Supplemental Table 1** Definition of covariates and outcomes and time-windows of inclusion.

| <b>Covariates</b>                                 | <b>Source of data in SNR cohort</b> | <b>Maximum time before baseline</b> | <b>Maximum time after baseline</b> |
|---------------------------------------------------|-------------------------------------|-------------------------------------|------------------------------------|
| Sex                                               | From SNR registry                   | -                                   | -                                  |
| Age                                               | From SNR registry                   | -                                   | -                                  |
| Cause of ESKD                                     | From SNR registry                   | -                                   | -                                  |
| Dialysis modality at start                        | From SNR registry                   | -                                   | -                                  |
| (Date of) kidney transplantation, recovery, death | From SNR registry                   | -                                   | -                                  |
| Date of start kidney replacement therapy          | From SNR registry                   | -                                   | -                                  |
| Vascular access at start                          | From SNR registry                   | -                                   | -                                  |
| Height                                            | From SNR registry                   | Any                                 | Any                                |
| Weight                                            | From SNR registry                   | 90 days                             | 90 days                            |
| Systolic blood pressure                           | From SNR registry                   | 180 days                            | 180 days                           |
| Diastolic blood pressure                          | From SNR registry                   | 180 days                            | 180 days                           |
| BMI                                               | Calculated from Height and Weight   | -                                   | -                                  |
| <b>Laboratory values:</b>                         |                                     |                                     |                                    |
| Albumin                                           | From SNR registry                   | 365 days                            | 365 days                           |
| Creatinine at start dialysis                      | From SNR registry                   | 30 days                             | 0 days                             |
| Haemoglobin                                       | From SNR registry                   | 90 days                             | 90 days                            |
| Calcium                                           | From SNR registry                   | 90 days                             | 90 days                            |
| Phosphate                                         | From SNR registry                   | 90 days                             | 90 days                            |
| PTH                                               | From SNR registry                   | 90 days                             | 90 days                            |
| C-Reactive Protein                                | From SNR registry                   | 90 days                             | 90 days                            |
| HbA1C                                             | From SNR registry                   | 90 days                             | 90 days                            |
| Total cholesterol (TC)                            | From SNR registry                   | 365 days                            | 365 days                           |
| Low density lipoprotein (LDL)                     | From SNR registry                   | 365 days                            | 365 days                           |
| High density lipoprotein (HDL)                    | From SNR registry                   | 365 days                            | 365 days                           |
| Total glycerides (TG)                             | From SNR registry                   | 365 days                            | 365 days                           |
| eGFR at start dialysis                            | Calculated using CKD-EPI 2009       | -                                   | -                                  |
| <b>Medication use at start dialysis:</b>          | From national medication registry   |                                     |                                    |
| <b>Antiplatelet agents</b>                        | <b>ATC code: B01AC</b>              | <b>180 days</b>                     | <b>0 days</b>                      |
| - Acetylsalicylic acid                            | <b>ATC code: B01AC06</b>            | <b>180 days</b>                     | <b>0 days</b>                      |
| - Clopidogrel                                     | <b>ATC code: B01AC04</b>            | <b>180 days</b>                     | <b>0 days</b>                      |
| - Dipyridamole                                    | <b>ATC code: B01AC07</b>            | <b>180 days</b>                     | <b>0 days</b>                      |
| <b>Antidiabetics</b>                              |                                     |                                     |                                    |
| - Insulin                                         | <b>ATC code: A10A</b>               | <b>180 days</b>                     | <b>0 days</b>                      |
| - Non-insulin                                     | <b>ATC code: A10B</b>               | <b>180 days</b>                     | <b>0 days</b>                      |
| <b>Statins</b>                                    | <b>ATC code: C10AA</b>              | <b>180 days</b>                     | <b>0 days</b>                      |
| <b>Antihypertensive medication</b>                |                                     |                                     |                                    |
| - Ace inhibitor/ARBs                              | <b>ATC code: C09</b>                | <b>180 days</b>                     | <b>0 days</b>                      |
| - Ca antagonist                                   | <b>ATC code: C08</b>                | <b>180 days</b>                     | <b>0 days</b>                      |
| - B blockers                                      | <b>ATC code: C07</b>                | <b>180 days</b>                     | <b>0 days</b>                      |

|                                                        |                                                                           |          |        |
|--------------------------------------------------------|---------------------------------------------------------------------------|----------|--------|
| - thiazide diuretics                                   | ATC code: C03A,<br>C03B                                                   | 180 days | 0 days |
| <b>Comorbidities before baseline:</b>                  | From national<br>comorbidity registry                                     |          |        |
| <i>Amputations before/after baseline</i>               | <b>KKÅ code: NFQ,<br/>NGQ NHQ.</b>                                        |          |        |
| - Hip                                                  | <b>KKÅ code: NFQ09</b>                                                    | Any      | Any    |
| - Transfemoral                                         | <b>KKÅ code: NFQ19</b>                                                    | Any      | Any    |
| - Knee                                                 | <b>KKÅ code: NGQ09</b>                                                    | Any      | Any    |
| - Transtibial                                          | <b>KKÅ code: NGQ19</b>                                                    | Any      | Any    |
| - Disarticulation of talocrural joint                  | <b>KKÅ code: NHQ09</b>                                                    | Any      | Any    |
| - Forefoot                                             | <b>KKÅ code: NHQ11-<br/>14</b>                                            | Any      | Any    |
| - Toe                                                  | <b>KKÅ code: NHQ16-<br/>17</b>                                            | Any      | Any    |
| - Amputation of limb or limbs                          | <b>ICD-10 code: Y83,5</b>                                                 | Any      | Any    |
| <i>Traumatic amputations before/after<br/>baseline</i> |                                                                           | Any      | Any    |
| - Hip and thigh                                        | <b>ICD-10 code: S78</b>                                                   | Any      | Any    |
| - Lower leg                                            | <b>ICD-10 code: S88</b>                                                   | Any      | Any    |
| - Ankle and foot                                       | <b>ICD-10 code: S98</b>                                                   | Any      | Any    |
| - Both feet                                            | <b>ICD-10 code: T05.3</b>                                                 | Any      | Any    |
| - Both legs                                            | <b>ICD-10 code: T05.5</b>                                                 | Any      | Any    |
| - Upper and lower extremities                          | <b>ICD-10 code: T05.6</b>                                                 | Any      | Any    |
| - Multiple, unspecified                                | <b>ICD-10 code: T05.9</b>                                                 | Any      | Any    |
| - Lower limb, level unspecified                        | <b>ICD-10 code: T13.6</b>                                                 | Any      | Any    |
| - Crush injury and then<br>amputation, unspecified     | <b>ICD-10 code: T14.7</b>                                                 | Any      | Any    |
| <i>Obesity</i>                                         | Calculated from BMI<br>(>30 kg/m <sup>2</sup> ).<br>or <b>ICD-10: E66</b> | Any      | 0      |
| <i>Hypertension</i>                                    | <b>ICD-10 code: I10-I15</b>                                               | Any      | 0      |
| <i>Diabetes mellitus</i>                               | <b>ICD-10 code: E10-<br/>E14</b>                                          | Any      | 0      |
| <i>Diabetic retinopathy</i>                            | <b>ICD-10 code: E10.3,<br/>E11.3, E14.3</b>                               | Any      | 0      |
| <i>Symptomatic peripheral artery disease</i>           | <b>ICD-10 code: I702,<br/>I739</b>                                        | Any      | 0      |
| <i>Dyslipidemia</i>                                    | <b>ICD-10 code: E78</b>                                                   | Any      | 0      |
| <i>Coronary Artery disease</i>                         | <b>ICD-10 code: I20-I25</b>                                               | Any      | 0      |
| <i>Valve disorders</i>                                 | <b>ICD-10 code: I134-<br/>I137</b>                                        | Any      | 0      |
| <i>Atrial fibrillation</i>                             | <b>ICD-10 code: I48</b>                                                   | Any      | 0      |
| <i>Congestive heart failure</i>                        | <b>ICD-10 code: I11.0,<br/>I13.0, I32, I50</b>                            | Any      | 0      |
| <i>Cerebral vascular disease</i>                       | <b>ICD-10 code: I60-I64,<br/>I69.0-I69.4 + G45</b>                        | Any      | 0      |
| <i>Malignancy &lt;10 years before start dialysis</i>   | <b>ICD-10 code: C00-<br/>C97</b>                                          | 10 years | 0      |

|                                 |                                                                                                 |        |   |
|---------------------------------|-------------------------------------------------------------------------------------------------|--------|---|
| <i>Bone fracture &lt;1 year</i> | <b>ICD-10 code: S02, S12, S22, S32, S42, S52, S62, S72, S82, S92, T02, T08, T10, T12, M48.4</b> | 1 year | 0 |
|---------------------------------|-------------------------------------------------------------------------------------------------|--------|---|

BMI = body mass index, CKD = chronic kidney disease, PD = peritoneal dialysis, HD = haemodialysis, AV fistula = arteriovenous fistula, eGFR = estimated glomerular filtration rate, PTH = parathyroid hormone, CRP = C-reactive protein, HDL = high-density lipoprotein, ACE-I = ACE inhibitors, ARBs = angiotensin II receptor blockers.

**Supplemental Table 2** Number of missing values and multiple imputation

| Covariate                 | SNR missing values (%) | NECOSAD missing values (%) | Secondary variable minimum days before baseline | Secondary variable maximum days before baseline |
|---------------------------|------------------------|----------------------------|-------------------------------------------------|-------------------------------------------------|
| Height                    | 683 (7.1)              | 91 (5.8)                   | NA                                              | NA                                              |
| Weight                    | 4489 (46.5)            | 91 (5.8)                   | 275                                             | 455                                             |
| Systolic blood pressure   | 2172 (22.5)            | 13 (0.8)                   | 275                                             | 455                                             |
| Diastolic blood pressure  | 2174 (22.5)            | 14 (0.8)                   | 275                                             | 455                                             |
| Albumin                   | 818 (8.4)              | 13 (0.8)                   | 640                                             | 820                                             |
| Haemoglobin               | 3979 (41.2)            | 10 (0.6)                   | 275                                             | 455                                             |
| Calcium albumin corrected | 4483 (46.5)            | 11 (0.7)                   | 275                                             | 455                                             |
| Phosphate                 | 4072 (42.2)            | 13 (0.8)                   | 275                                             | 455                                             |
| PTH                       | 2409 (25.0)            | -                          | 275                                             | 455                                             |
| CRP                       | 4713 (48.9)            | 923 (55.7)                 | 275                                             | 455                                             |
| Cholesterol total         | 6268 (65.0)            | 186 (11.2)                 | 640                                             | 820                                             |
| Cholesterol HDL           | 6471 (67.1)            | -                          | 640                                             | 820                                             |
| Triglycerid               | 6783 (70.3)            | -                          | 640                                             | 820                                             |
| BMI                       | 4531 (47.0)            | 91 (5.8)                   | 275                                             | 455                                             |
| Obesity                   | 4100 (42.5)            | 91 (5.8)                   | 275                                             | 455                                             |
| eGFR at start             | 3775 (39.2)            | 1139                       | 335                                             | 700                                             |
| Female sex                | 0 (0)                  | 1 (0.1)                    | -                                               | -                                               |
| Diabetes mellitus         | 0 (0)                  | 146 (8.8)                  | -                                               | -                                               |
| Diabetic retinopathy      | 0 (0)                  | 163 (9.8)                  | -                                               | -                                               |
| Peripheral artery disease | 0 (0)                  | 147 (8.9)                  | -                                               | -                                               |
| Coronary artery disease   | 0 (0)                  | 147 (8.9)                  | -                                               | -                                               |
| Cerebral vascular disease | 0 (0)                  | 147 (8.9)                  | -                                               | -                                               |
| Cardiovascular disease    | 0 (0)                  | 147 (8.9)                  | -                                               | -                                               |
| Congestive heart failure  | 0 (0)                  | 147 (8.9)                  |                                                 |                                                 |
| Malignancy                | 0 (0)                  | 147 (8.9)                  | -                                               | -                                               |
| Acetylsalicylic acid      | 0 (0)                  | 164 (9.9)                  | -                                               | -                                               |
| Statins                   | 0 (0)                  | 164 (9.9)                  | -                                               | -                                               |
| Insulin                   | 0 (0)                  | 171 (10.3)                 | -                                               | -                                               |

Some individuals did not have laboratory/demographic/blood pressure values available within our prespecified time. (**Supplemental Table 1**) Therefore, for all individuals secondary variables were created containing the values before our prespecified time, which likely would be informative for what the missing value would have been. These variables and all covariates and outcome variables as described in **Supplemental Table 1** were used during multiple imputation. BMI = body mass index, eGFR = estimated glomerular filtration rate, PTH = parathyroid hormone, CRP = C-reactive protein, HDL = high-density lipoprotein.

**Supplemental Table 3** The following candidate coefficients were preselected and are ranked in order of relevance

|                                                                                  |
|----------------------------------------------------------------------------------|
| 1. Female sex                                                                    |
| 2. Age (years)                                                                   |
| 3. Diabetes Mellitus                                                             |
| 4. Symptomatic peripheral artery disease                                         |
| 5. Cardiovascular disease (Cerebral vascular disease or Coronary artery disease) |
| 6. Congestive heart failure                                                      |
| 7. Obesity                                                                       |
| 8. Albumin (g/L)                                                                 |
| 9. Haemoglobin (mmol/L)                                                          |
| 10. Diabetic retinopathy                                                         |
| 11. Body mass index (kg/m <sup>2</sup> )                                         |
| 12. Triglycerides (mmol/L)                                                       |
| 13. Hypertension                                                                 |
| 14. Peritoneal dialysis                                                          |
| 15. Phosphate (mmol/L)                                                           |

**Supplemental Table 4** Correlation matrix

|         | Female | Age   | Obesity | Albumin | Hb    | DM    | DR    | PAD   | CVD   | CHF   |
|---------|--------|-------|---------|---------|-------|-------|-------|-------|-------|-------|
| Female  |        | -0.02 | 0.03    | -0.01   | 0.01  | -0.02 | 0     | -0.01 | -0.08 | -0.02 |
| Age     | -0.02  |       | -0.12   | -0.04   | 0.03  | 0.04  | -0.07 | 0.11  | 0.24  | 0.21  |
| Obesity | 0.03   | -0.12 |         | 0.01    | 0     | 0.25  | 0.17  | -0.01 | 0.01  | 0.07  |
| Albumin | -0.01  | -0.04 | 0.01    |         | 0.2   | -0.1  | -0.1  | -0.02 | -0.02 | -0.07 |
| Hb      | 0.01   | 0.03  | 0       | 0.2     |       | -0.01 | -0.01 | 0.01  | 0.03  | 0.01  |
| DM      | -0.02  | 0.04  | 0.25    | -0.1    | -0.01 |       | 0.63  | 0.12  | 0.2   | 0.21  |
| DR      | 0      | -0.07 | 0.17    | -0.1    | -0.01 | 0.63  |       | 0.1   | 0.14  | 0.18  |
| PAD     | -0.01  | 0.11  | -0.01   | -0.02   | 0.01  | 0.12  | 0.1   |       | 0.18  | 0.16  |
| CVD     | -0.08  | 0.24  | 0.01    | -0.02   | 0.03  | 0.2   | 0.14  | 0.18  |       | 0.32  |
| CHF     | -0.02  | 0.21  | 0.07    | -0.07   | 0.01  | 0.21  | 0.18  | 0.16  | 0.32  |       |

We expected to find some collinearity in the shaded coefficients. This is confirmed by some correlation between diabetes mellitus and diabetic retinopathy (0.63). Since we deemed adding both coefficients would provide valuable extra information we included them both in the final model. CHF = Congestive heart failure, CVD = Cardiovascular disease, DM = Diabetes Mellitus, DR = Diabetic retinopathy, Hb = Haemoglobin, PAD = Peripheral artery Disease



**Supplemental Table 5** Final model cumulative incidence at 3 years and coefficients

| <b>Coefficient</b>                                                            | <b>Value</b> | <b>SE</b> | <b>Variable type</b> | <b>Transformation</b> |
|-------------------------------------------------------------------------------|--------------|-----------|----------------------|-----------------------|
| Cumulative incidence at 3 years                                               | 0.0096       | -         | -                    | -                     |
| Female sex                                                                    | -0.4652      | 0.1691    | Categorical          | -                     |
| Age when starting dialysis (years)                                            | -0.0003      | 0.0068    | Continuous           | None                  |
| Diabetes mellitus                                                             | 0.7332       | 0.2405    | Categorical          | -                     |
| Symptomatic peripheral artery disease                                         | 0.9705       | 0.1720    | Categorical          | -                     |
| Cardiovascular disease (coronary artery disease of cerebral vascular disease) | 0.3577       | 0.2328    | Categorical          | -                     |
| Congestive heart failure                                                      | 0.5456       | 0.2258    | Categorical          | -                     |
| Obesity                                                                       | 0.2953       | 0.1943    | Categorical          | -                     |
| Serum albumin (g/L)                                                           | -0.0128      | 0.0170    | Continuous           | None                  |
| Serum haemoglobin (mmol/L)                                                    | 0.1076       | 0.0904    | Continuous           | None                  |
| Diabetic retinopathy                                                          | 0.8981       | 0.1852    | Categorical          | -                     |

**A**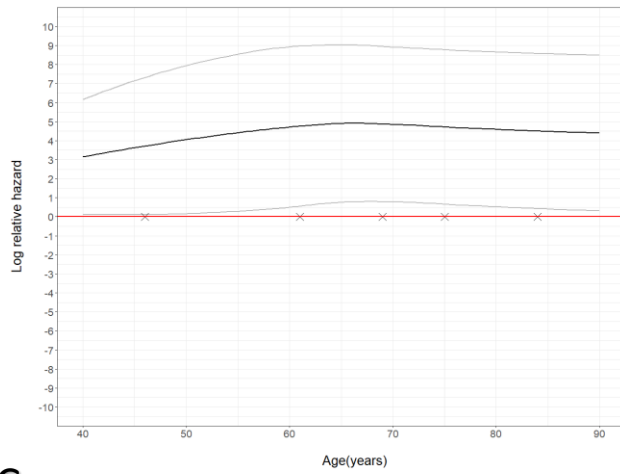**B**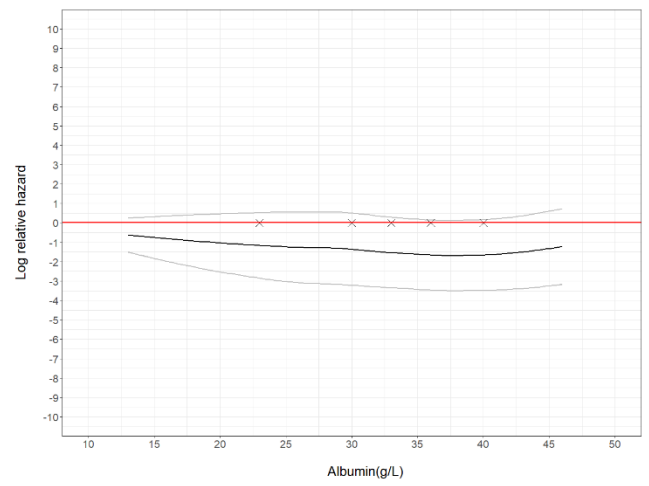**C**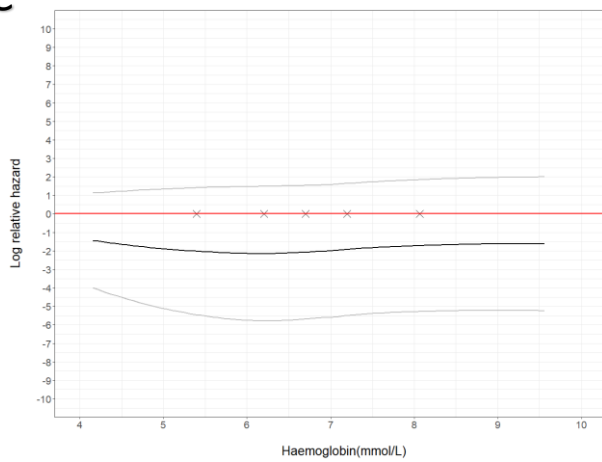

**Supplemental figure 1. Linearity of continuous coefficients**

The log relative hazard is plotted as a restricted cubic spline with 5 knots to continuous coefficients. The ability to draw a straight line within the 95CI supports the linearity assumption of all continuous variables.

A: Age (years)

B: Albumin (g/L)

C: Haemoglobin (mmol/L)

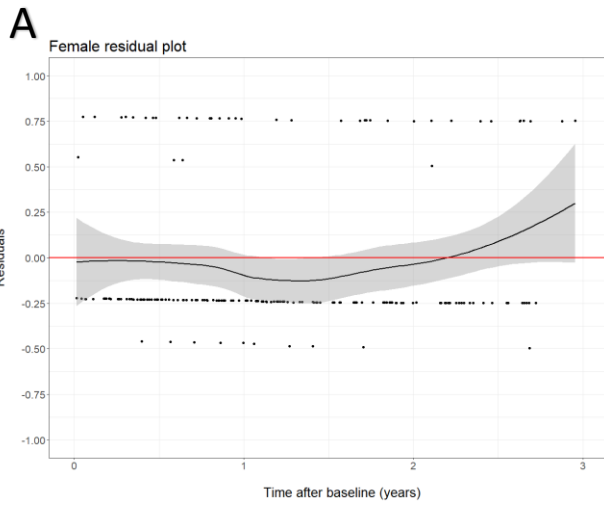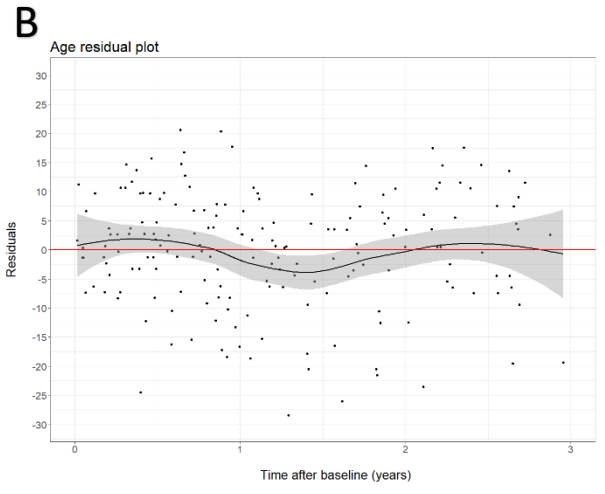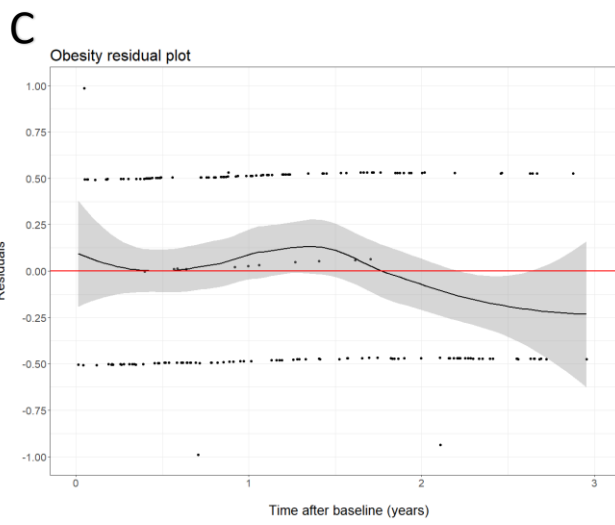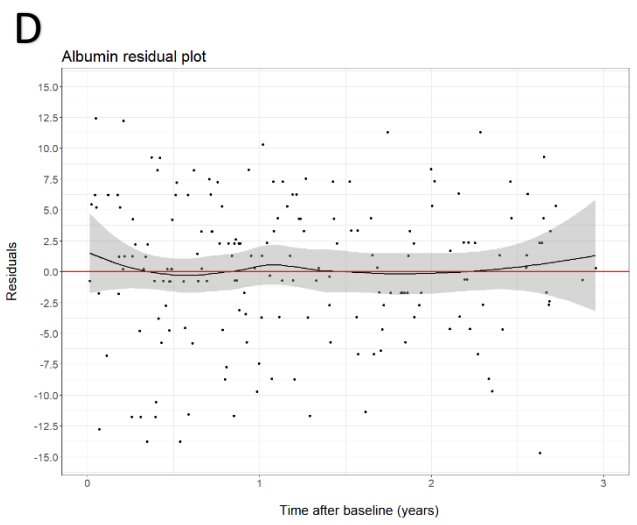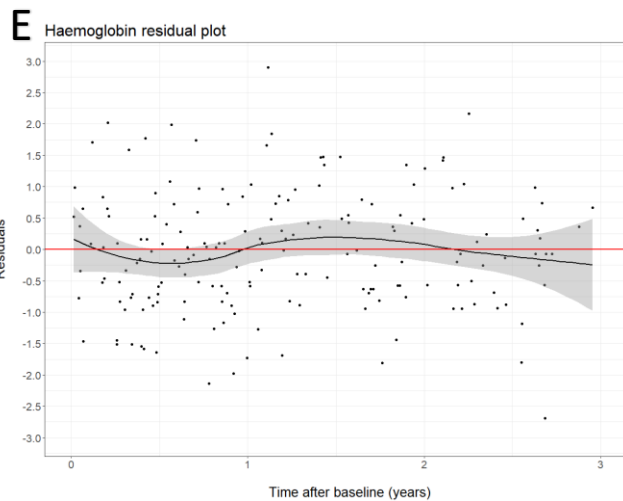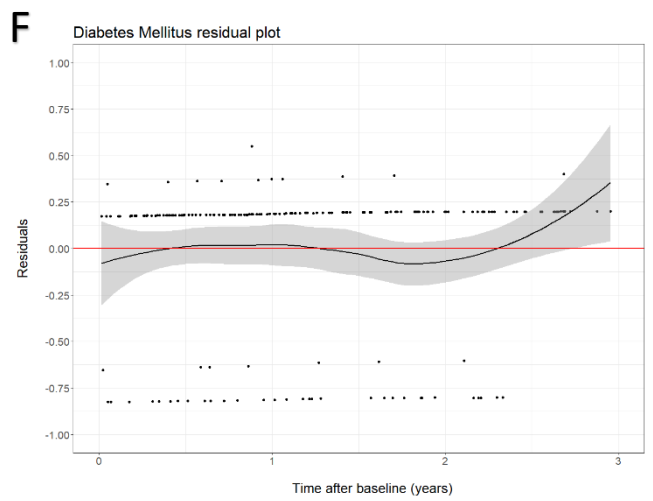

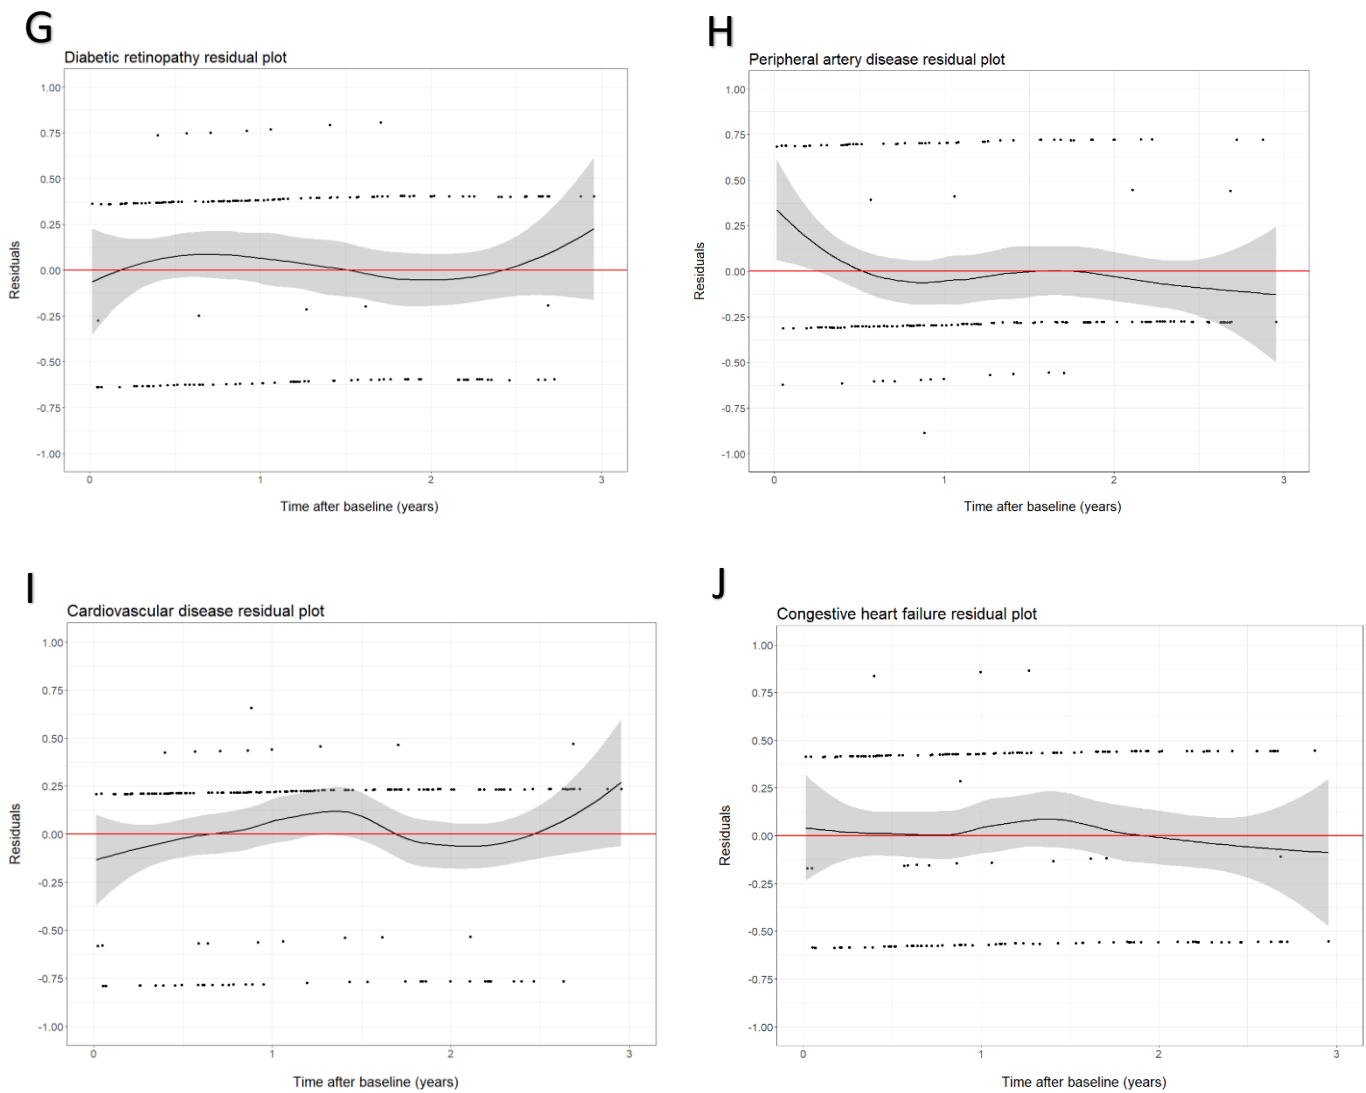

### Supplemental figure 2. Residuals plot for proportional hazards

Analogue of the Schoenfeld residuals are plotted to the corresponding time after baseline. If hazards are not proportional the 95CI of the residuals does not contain 0. None of the plots violated the proportional hazards assumption sufficiently to warrant exclusion or transformation.

- A: Female sex
- B: Age (years)
- C: Obesity
- D: Albumin (g/L)
- E: Haemoglobin (mmol/L)
- F: Diabetes Mellitus
- G: Diabetic retinopathy
- H: Symptomatic peripheral artery disease
- I: Cardiovascular disease (Cerebral vascular disease or Coronary artery disease)
- J: Congestive heart failure

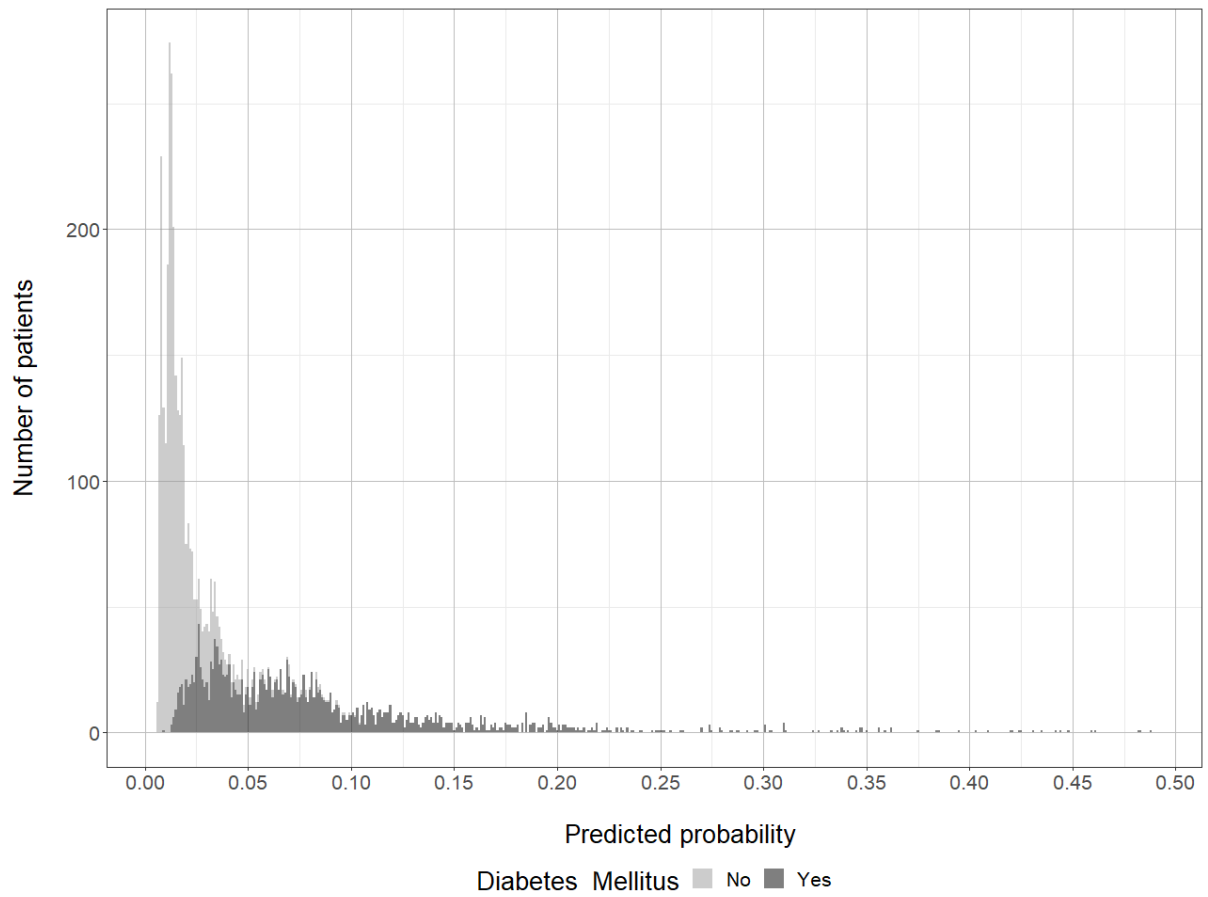

**Supplemental figure 3.** Distribution of predicted probabilities  
Distribution of predicted probabilities for patients with and without diabetes mellitus

**A**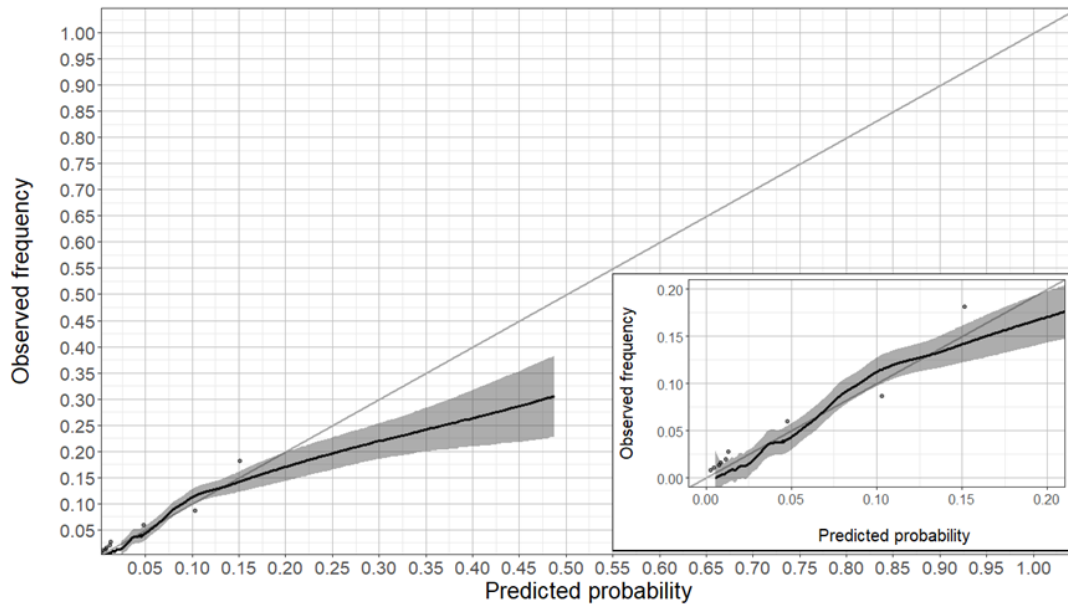**B**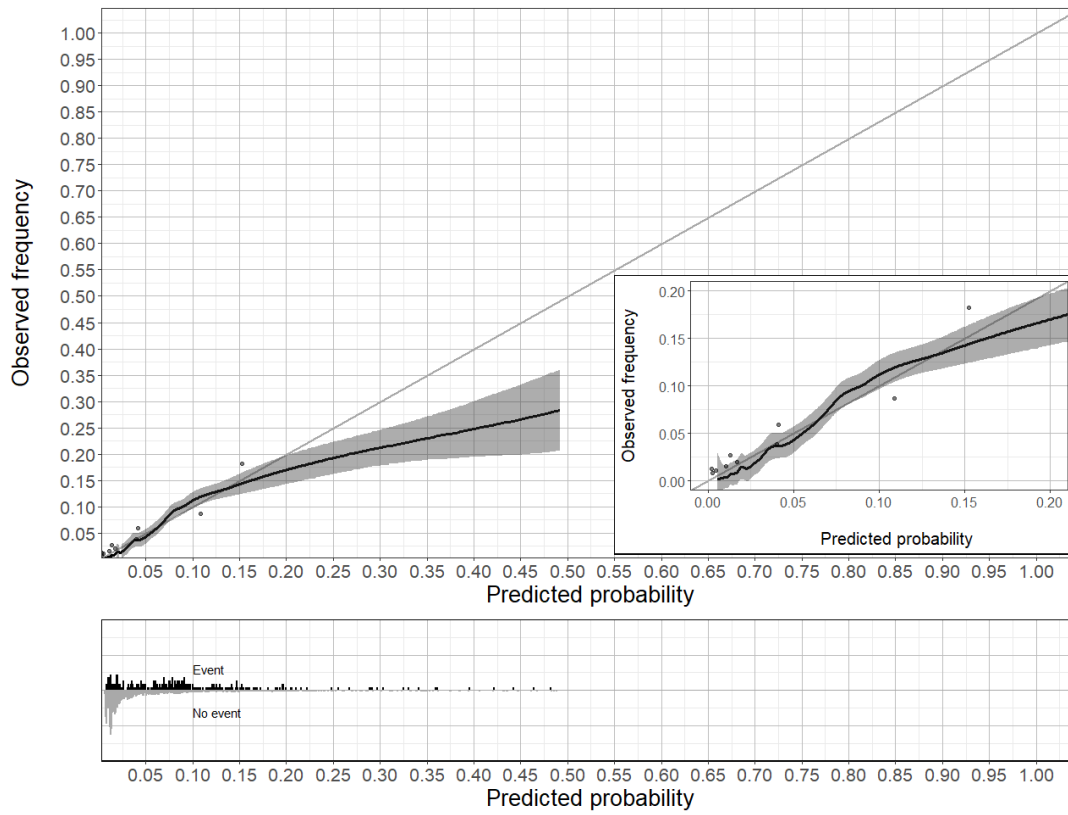

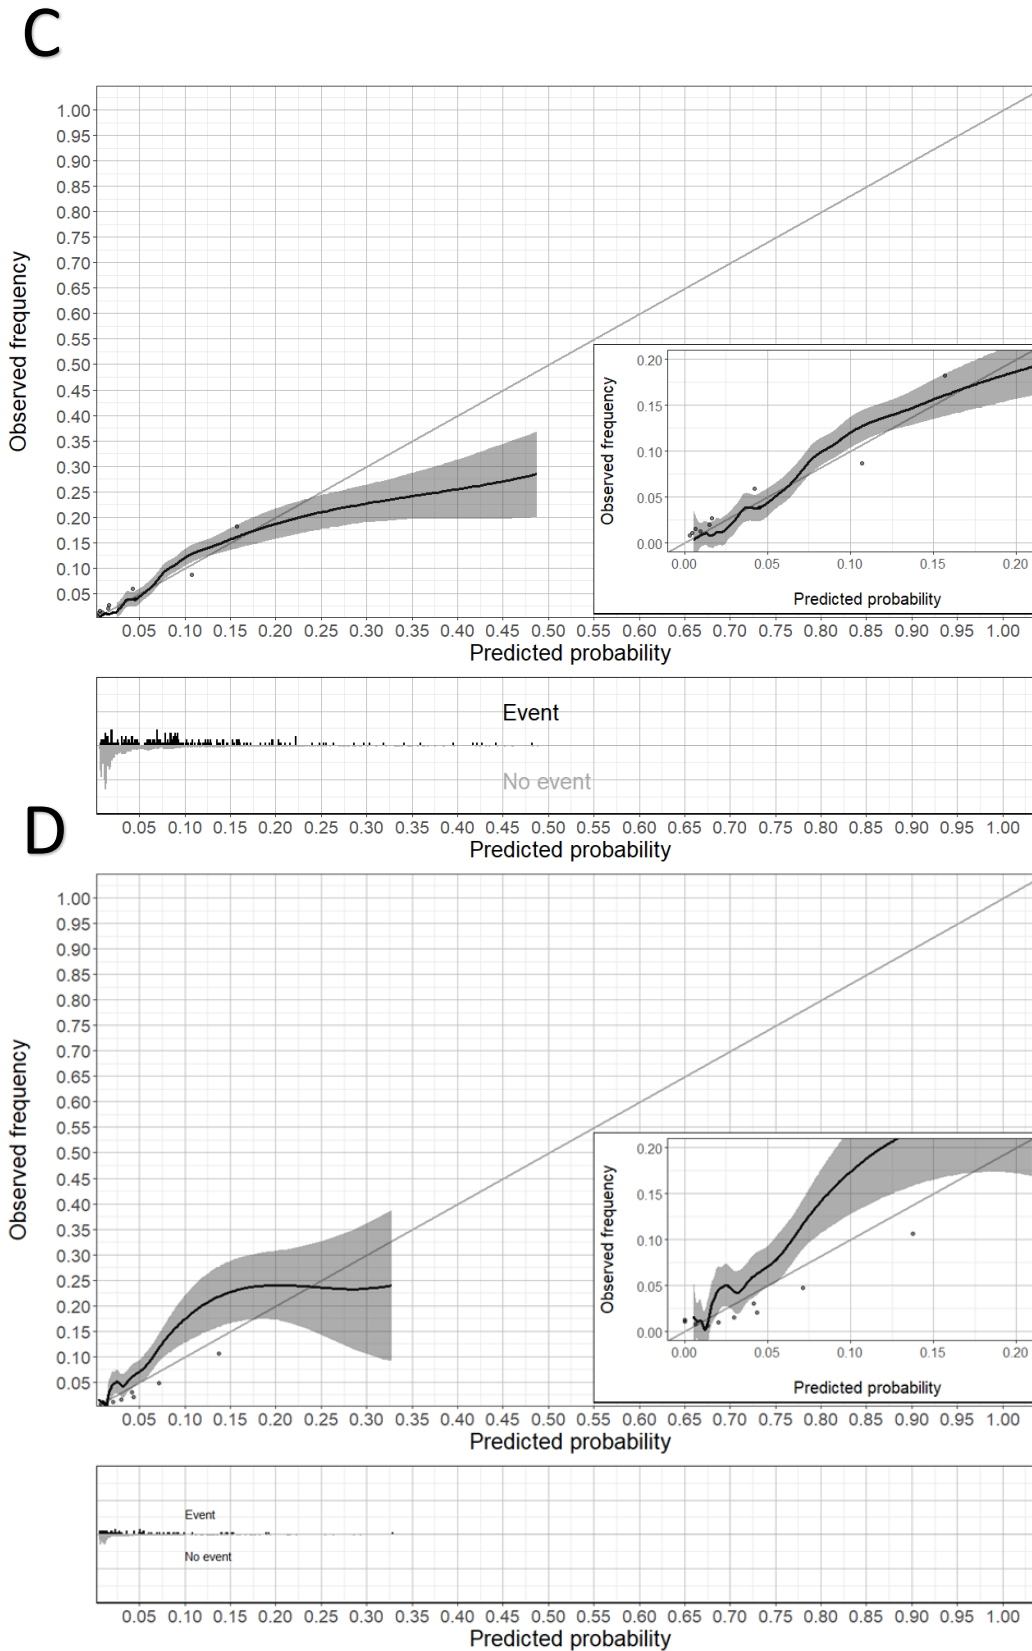

**Supplemental figure 2. Calibration plots during sensitivity analyses**

The predicted probability in the cohort is plotted to the observed probability. The shaded area indicates the 95% confidence interval. The grey 45 degree line indicates perfect calibration. The histograms show the relative incidence of either amputation or other type event compared to the predicted probability. The cohort is also divided into 10 percentiles according to their predicted probability. The grey dots show the average predicted probability of each group plotted against the average observed frequency.

A: SNR validation (rural) cohort: Recovery excluded

B: SNR validation (rural) cohort: No censoring after kidney transplant

C: SNR validation (rural) cohort: No exclusion if patient started dialysis after kidney transplant failure

| Section/Topic                | Item | Checklist Item                                                                                                                                                                                            | Page  |
|------------------------------|------|-----------------------------------------------------------------------------------------------------------------------------------------------------------------------------------------------------------|-------|
| <b>Title and abstract</b>    |      |                                                                                                                                                                                                           |       |
| Title                        | 1    | D;V Identify the study as developing and/or validating a multivariable prediction model, the target population, and the outcome to be predicted.                                                          | 1     |
| Abstract                     | 2    | D;V Provide a summary of objectives, study design, setting, participants, sample size, predictors, outcome, statistical analysis, results, and conclusions.                                               | 3     |
| <b>Introduction</b>          |      |                                                                                                                                                                                                           |       |
| Background and objectives    | 3a   | D;V Explain the medical context (including whether diagnostic or prognostic) and rationale for developing or validating the multivariable prediction model, including references to existing models.      | 4     |
|                              | 3b   | D;V Specify the objectives, including whether the study describes the development or validation of the model or both.                                                                                     | 4     |
| <b>Methods</b>               |      |                                                                                                                                                                                                           |       |
| Source of data               | 4a   | D;V Describe the study design or source of data (e.g., randomized trial, cohort, or registry data), separately for the development and validation data sets, if applicable.                               | 5     |
|                              | 4b   | D;V Specify the key study dates, including start of accrual; end of accrual; and, if applicable, end of follow-up.                                                                                        | 5     |
| Participants                 | 5a   | D;V Specify key elements of the study setting (e.g., primary care, secondary care, general population) including number and location of centres.                                                          | 5     |
|                              | 5b   | D;V Describe eligibility criteria for participants.                                                                                                                                                       | 5     |
|                              | 5c   | D;V Give details of treatments received, if relevant.                                                                                                                                                     | NA    |
| Outcome                      | 6a   | D;V Clearly define the outcome that is predicted by the prediction model, including how and when assessed.                                                                                                | 5     |
|                              | 6b   | D;V Report any actions to blind assessment of the outcome to be predicted.                                                                                                                                | 6     |
| Predictors                   | 7a   | D;V Clearly define all predictors used in developing or validating the multivariable prediction model, including how and when they were measured.                                                         | 6     |
|                              | 7b   | D;V Report any actions to blind assessment of predictors for the outcome and other predictors.                                                                                                            | 6     |
| Sample size                  | 8    | D;V Explain how the study size was arrived at.                                                                                                                                                            | 6     |
| Missing data                 | 9    | D;V Describe how missing data were handled (e.g., complete-case analysis, single imputation, multiple imputation) with details of any imputation method.                                                  |       |
| Statistical analysis methods | 10a  | D Describe how predictors were handled in the analyses.                                                                                                                                                   | 6     |
|                              | 10b  | D Specify type of model, all model-building procedures (including any predictor selection), and method for internal validation.                                                                           | 6     |
|                              | 10c  | V For validation, describe how the predictions were calculated.                                                                                                                                           | 6     |
|                              | 10d  | D;V Specify all measures used to assess model performance and, if relevant, to compare multiple models.                                                                                                   | 6-7   |
|                              | 10e  | V Describe any model updating (e.g., recalibration) arising from the validation, if done.                                                                                                                 | NA    |
| Risk groups                  | 11   | D;V Provide details on how risk groups were created, if done.                                                                                                                                             | NA    |
| Development vs. validation   | 12   | V For validation, identify any differences from the development data in setting, eligibility criteria, outcome, and predictors.                                                                           | 6     |
| <b>Results</b>               |      |                                                                                                                                                                                                           |       |
| Participants                 | 13a  | D;V Describe the flow of participants through the study, including the number of participants with and without the outcome and, if applicable, a summary of the follow-up time. A diagram may be helpful. | 8     |
|                              | 13b  | D;V Describe the characteristics of the participants (basic demographics, clinical features, available predictors), including the number of participants with missing data for predictors and outcome.    | 8     |
|                              | 13c  | V For validation, show a comparison with the development data of the distribution of important variables (demographics, predictors and outcome).                                                          | 8     |
| Model development            | 14a  | D Specify the number of participants and outcome events in each analysis.                                                                                                                                 | 8     |
|                              | 14b  | D If done, report the unadjusted association between each candidate predictor and outcome.                                                                                                                | NA    |
| Model specification          | 15a  | D Present the full prediction model to allow predictions for individuals (i.e., all regression coefficients, and model intercept or baseline survival at a given time point).                             | 8     |
|                              | 15b  | D Explain how to use the prediction model.                                                                                                                                                                | 9     |
| Model performance            | 16   | D;V Report performance measures (with CIs) for the prediction model.                                                                                                                                      | 9     |
| Model-updating               | 17   | V If done, report the results from any model updating (i.e., model specification, model performance).                                                                                                     | NA    |
| <b>Discussion</b>            |      |                                                                                                                                                                                                           |       |
| Limitations                  | 18   | D;V Discuss any limitations of the study (such as nonrepresentative sample, few events per predictor, missing data).                                                                                      | 11    |
| Interpretation               | 19a  | V For validation, discuss the results with reference to performance in the development data, and any other validation data.                                                                               | NA    |
|                              | 19b  | D;V Give an overall interpretation of the results, considering objectives, limitations, results from similar studies, and other relevant evidence.                                                        | 10-11 |
| Implications                 | 20   | D;V Discuss the potential clinical use of the model and implications for future research.                                                                                                                 | 10    |
| <b>Other information</b>     |      |                                                                                                                                                                                                           |       |
| Supplementary information    | 21   | D;V Provide information about the availability of supplementary resources, such as study protocol, Web calculator, and data sets.                                                                         | 13    |
| Funding                      | 22   | D;V Give the source of funding and the role of the funders for the present study.                                                                                                                         | 12    |

\*Items relevant only to the development of a prediction model are denoted by D, items relating solely to a validation of a prediction model are denoted by V, and items relating to both are denoted D;V. We recommend using the TRIPOD Checklist in conjunction with the TRIPOD Explanation and Elaboration document.
